# Supplementary material for: Metal–organic green dye: chemical and physical insight into a modified Zn-benzoporphyrin for dye-sensitized solar cells
Source: Royal Society of Chemistry journal article supplement (doi:10.1039/c5ra20945e), 2016-01-01
Supplement: c5ra20945e1.pdf [file c5ra20945e1.pdf]

## Supporting Information

### Metal-Organic Green Dye: Chemical and Physical Insight Into a Modified Zn-Benzoporphyrin for Dye-Sensitized Solar Cells.

Gloria Zanotti<sup>a</sup>, Nicola Angelini<sup>a</sup>, Giuseppe Mattioli<sup>a</sup>, Anna Maria Paoletti<sup>a</sup>, Giovanna Pennesi<sup>a</sup>, Gentilina Rossi<sup>a</sup>, Daniela Caschera<sup>b</sup>, Luisa De Marco<sup>c</sup>, Giuseppe Gigli<sup>d,e</sup>

~~~~~

Table S1: Time-resolved fluorescence data from multiexponential fitting procedures ( $\chi^2 \sim 1$ ) \*

| PETBP in CH <sub>3</sub> CN |                |                | TiO <sub>2</sub> -supported |                |                | ZrO <sub>2</sub> -supported |                |                |
|-----------------------------|----------------|----------------|-----------------------------|----------------|----------------|-----------------------------|----------------|----------------|
| $\tau_1$                    | $\tau_2$       | $\tau_3$       | $\tau_1$                    | $\tau_2$       | $\tau_3$       | $\tau_1$                    | $\tau_2$       | $\tau_3$       |
| 6.5                         | 1.4            | 0.23           | 0.09                        | 0.47           | 1.34           | 0.12                        | 0.54           | 2.5            |
| B <sub>1</sub>              | B <sub>2</sub> | B <sub>3</sub> | B <sub>1</sub>              | B <sub>2</sub> | B <sub>3</sub> | B <sub>1</sub>              | B <sub>2</sub> | B <sub>3</sub> |
| 60                          | 29             | 11             | 56                          | 33             | 11             | 68                          | 28             | 4              |

\*  $\tau$ = lifetime in ns; B= population in %

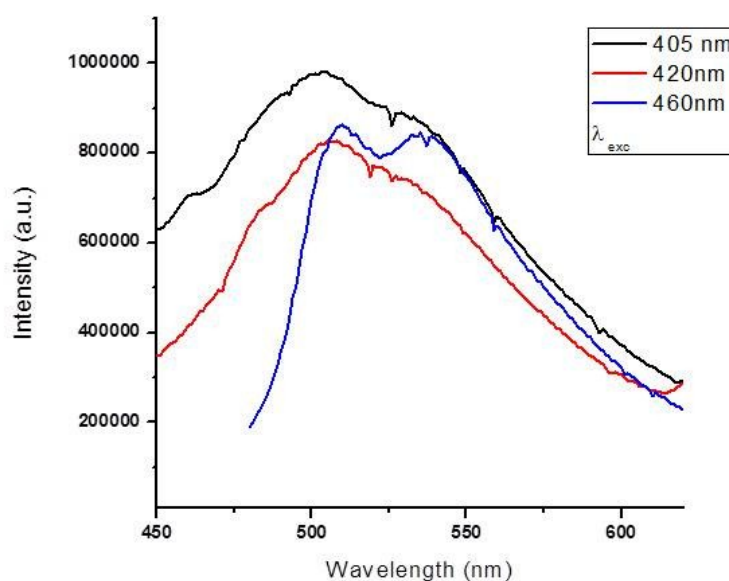

Fig. S1 Different shape of the  $S_2 \rightarrow S_0$  fluorescence band at different excitation wavelengths.

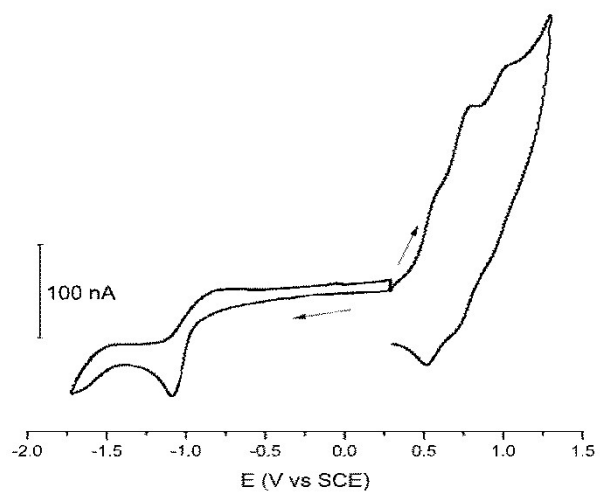

Figure S2: Cyclic voltammetry of **PETBP** in acetonitrile solution, scan rate 100mV/s.

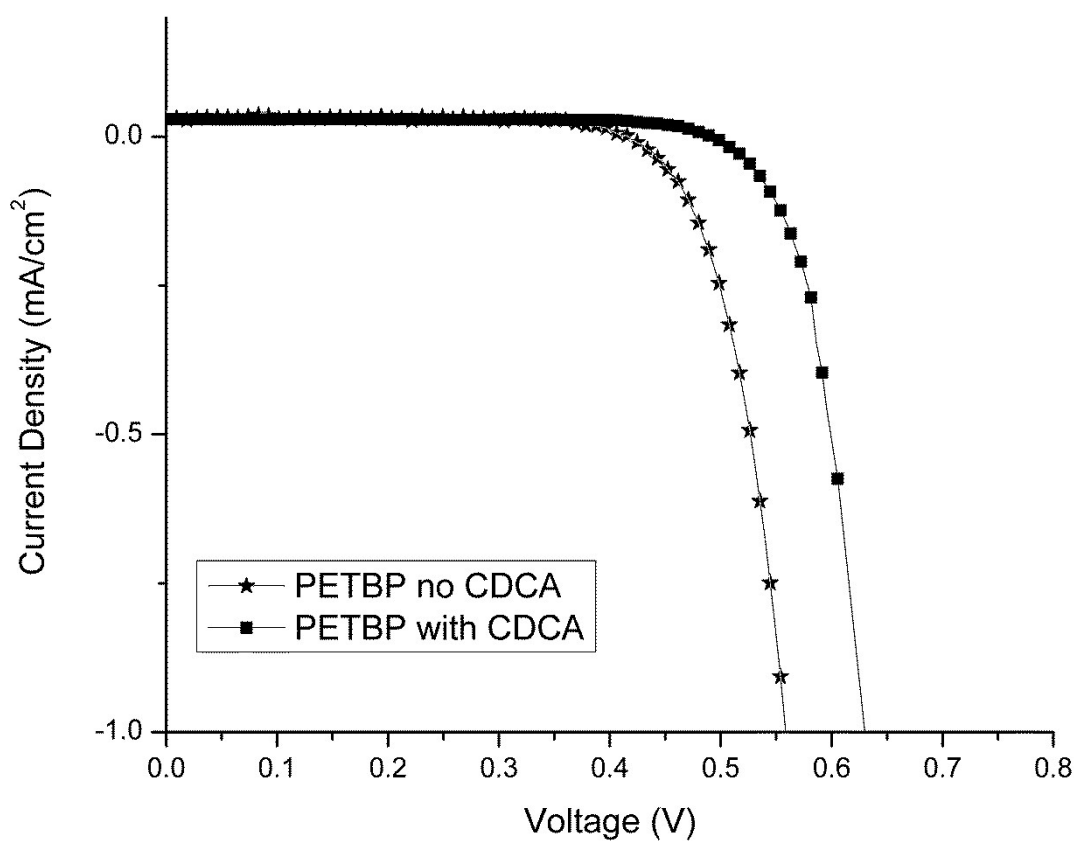

Fig S3: Dark current measurements for DSSC based on **PETBP** with and without CDCA.
